# Supplementary material for: Studying noncovalent or covalent bond problem between smoothened and cholesterol by molecular dynamics simulation and Markov state model
Source: Royal Society of Chemistry journal article supplement (doi:10.1039/d2cp01453j), 2022-01-01
Supplement: d2cp01453j1.pdf [file d2cp01453j1.pdf]

## Supplementary information

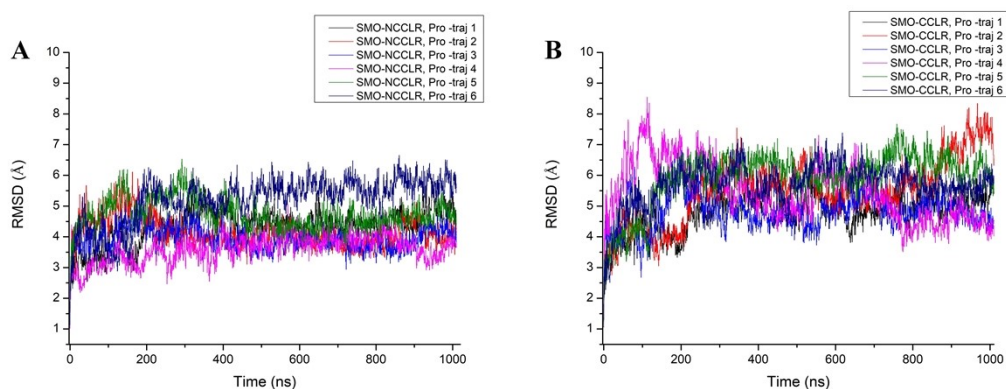

**Fig. S1** The curves of RMSD based on the whole protein versus simulation time. (A) The RMSD curves of the whole protein of SMO-NCCLR system versus 1010 ns MD simulation time. (B) The RMSD curves of the whole protein of SMO-CCLR system versus 1010 ns MD simulation time. The different color curves represent different parallel trajectories.

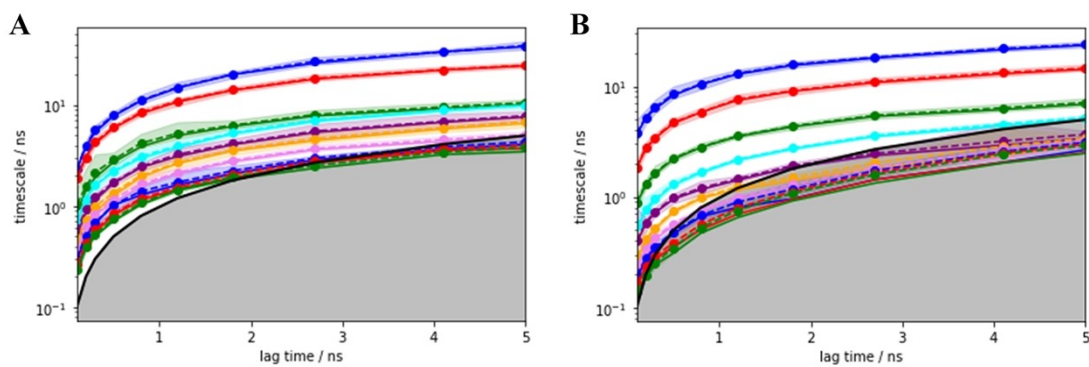

**Fig. S2** The estimation of implied timescales (ITS) in different systems. (A) The ITS estimation to select the lag time in SMO-NCCLR. (B) The ITS estimation to select the lag time in SMO-CCLR.

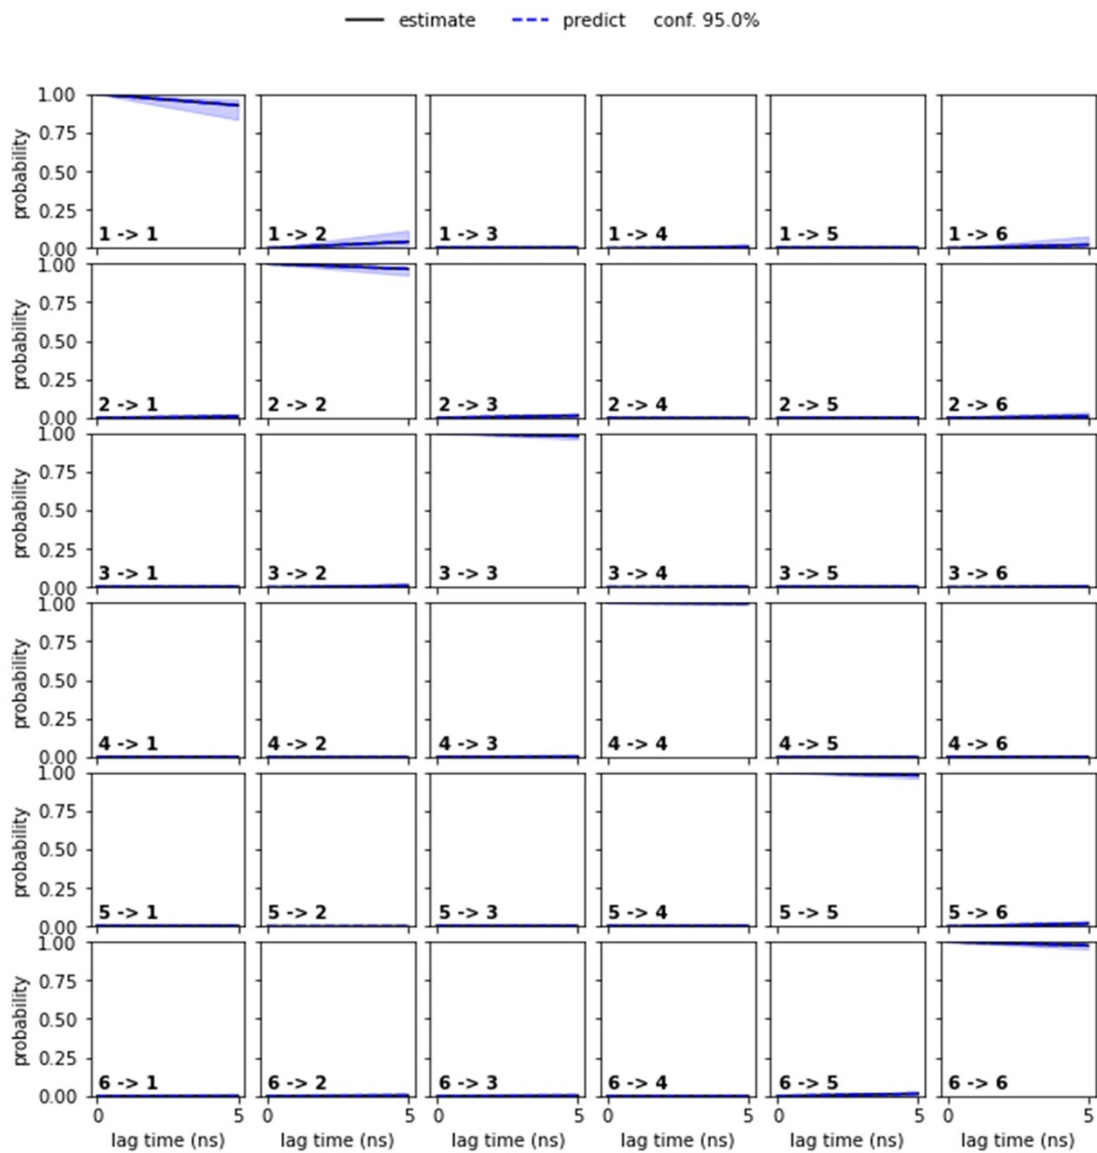

**Fig. S3** Chapman-Kolmogorov test on the Bayesian Markov model at lag time 0.5 ns in SMO-NCCLR.

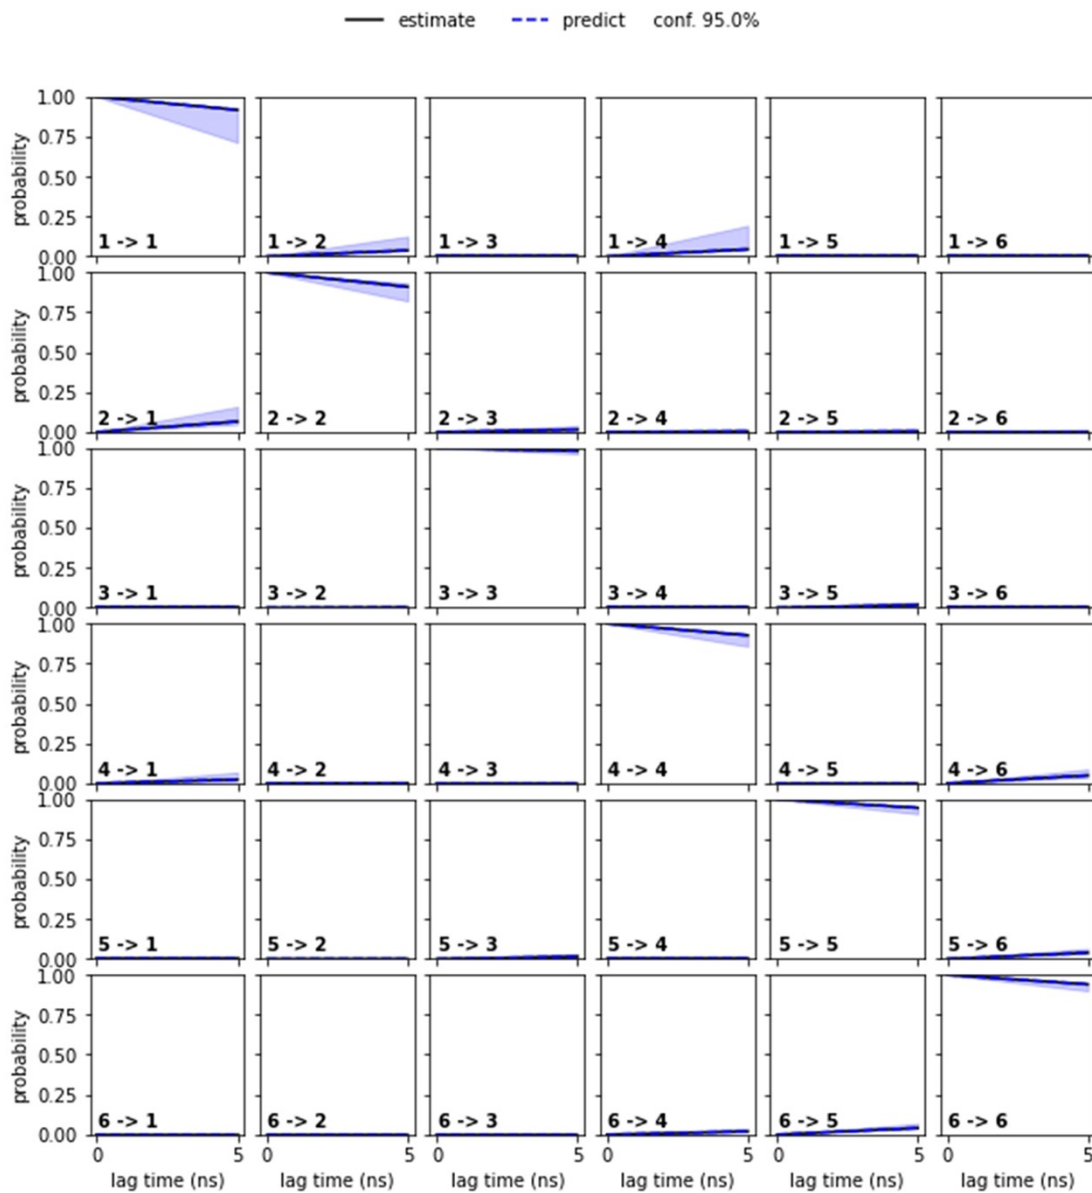

**Fig. S4** Chapman-Kolmogorov test on the Bayesian Markov model at lag time 0.5 ns in SMO-CCLR.

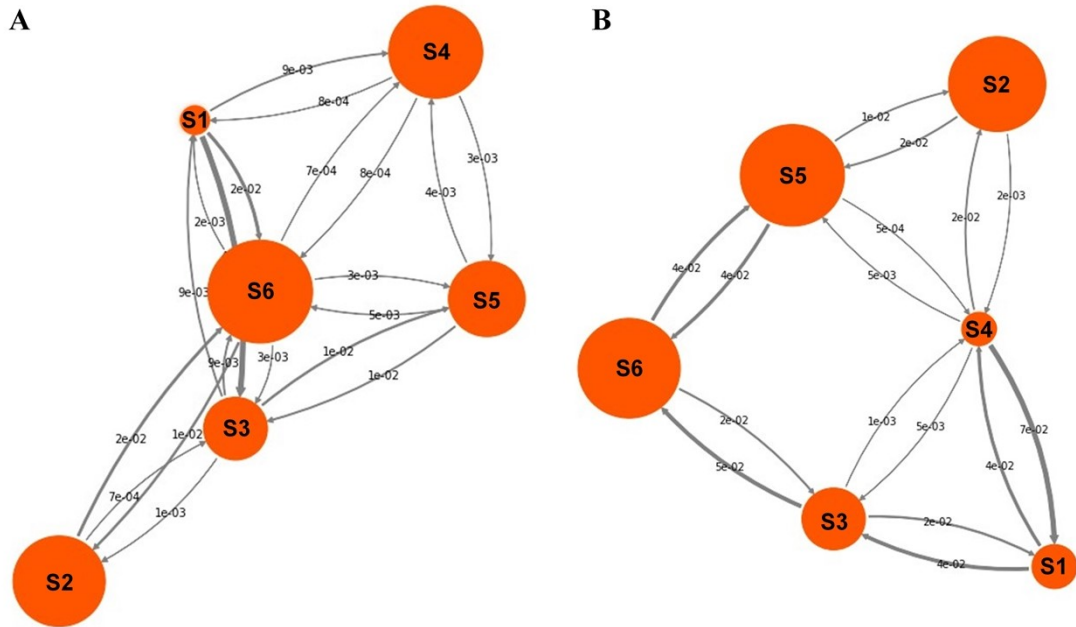

**Fig. S5** The transition probability in different systems. (A) The transition probability in SMO-NCCLR. (B) The transition probability in SMO-CCLR. State 1-6 are abbreviated to S1-6. The size of each state is proportional to the life time of the corresponding state.

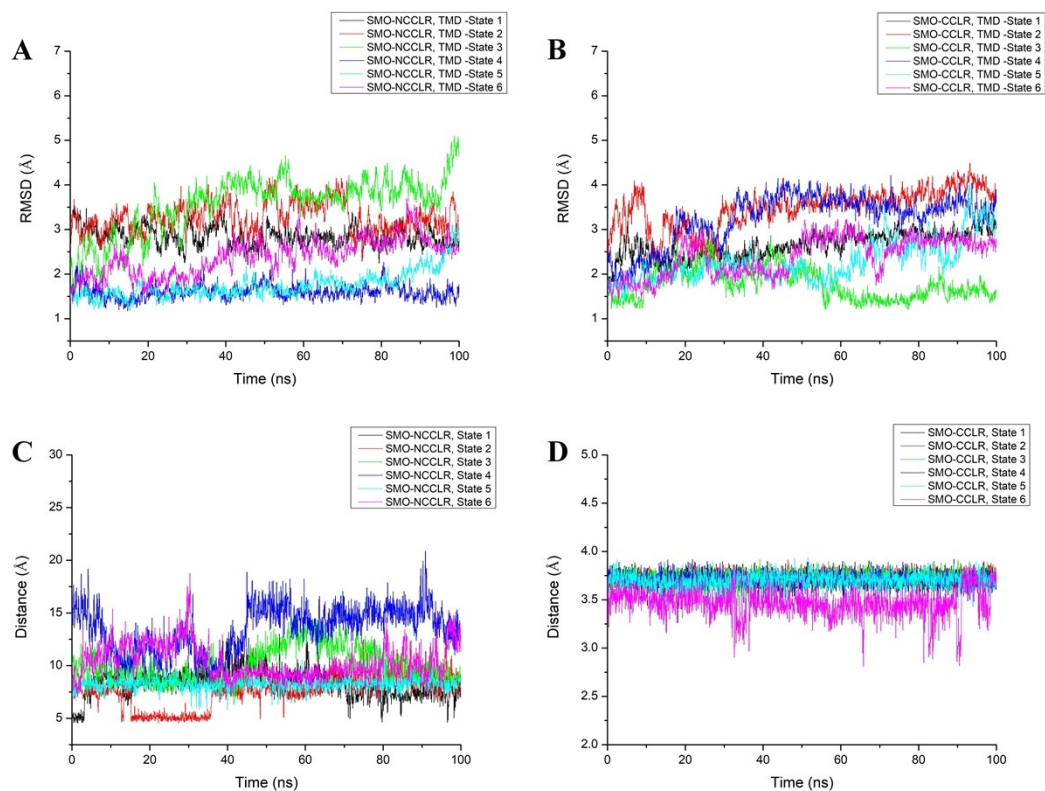

**Fig. S6** The curves of TMD RMSD and distance versus simulation time. (A) TMD RMSD curves of representative structures of six states of SMO-NCCLR versus 100 ns MD simulation time. (B) TMD RMSD curves of representative structures of six states of SMO-CCLR versus 100 ns MD simulation time. (C) The distance between the  $C\alpha$  atoms of residue Asp95 and the oxygen atom on the  $3\beta$ -hydroxyl group in cholesterol of representative structures of six states of SMO-NCCLR versus 100 ns MD simulation time. (D) The distance between the  $C\alpha$  atoms of residue Asp95 and the oxygen atom on the  $3\beta$ -hydroxyl group in cholesterol of representative structures of six states of SMO-CCLR versus 100 ns MD simulation time. The different color curves represent different trajectories of representative structures of six states of different systems.

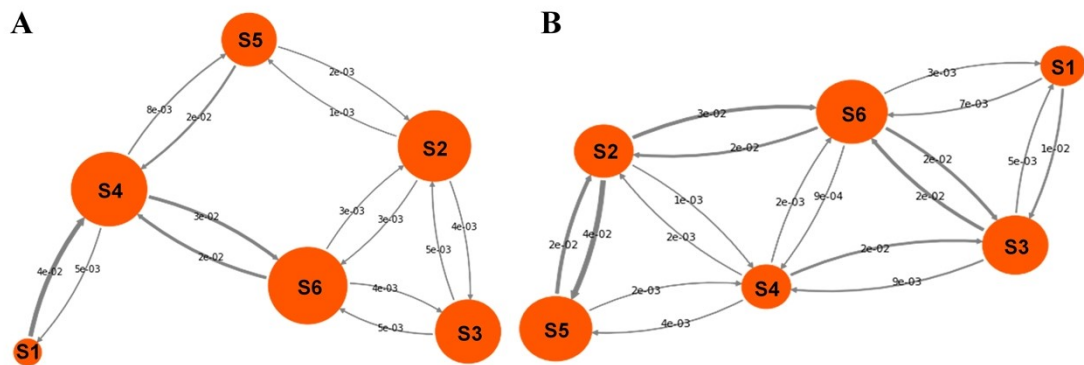

**Fig. S7** The transition probability of six metastable states after MSM reconstruction in different systems. (A) The transition probability of six metastable states in SMO-NCCLR. (B) The transition probability of six metastable states in SMO-CCLR.

**Table S1** Pathways induced from HMMs and flux of each pathway after MSM reconstruction in SMO-NCCLR

| path                  | Path flux              | % path | % of total |
|-----------------------|------------------------|--------|------------|
| S1→S4→S6              | 0.00020288133148761654 | 97.5%  | 97.5%      |
| S1→S4→S5→S2→S6        | 3.1663305227461353e-06 | 1.5%   | 99.0%      |
| S1→S4→S5→S2→S3<br>→S6 | 2.123574975409254e-06  | 1.0%   | 100.0%     |

**Table S2** Pathways induced from HMMs and flux of each pathway after MSM reconstruction in SMO-CCLR

| path                  | Path flux             | % path | % of total |
|-----------------------|-----------------------|--------|------------|
| S1→S3→S6              | 0.000149966168760486  | 51.0%  | 51.0%      |
| S1→S6                 | 0.0001265098833599364 | 43.0%  | 94.1%      |
| S1→S3→S4→S5→S2<br>→S6 | 8.063993352033939e-06 | 2.7%   | 96.8%      |
| S1→S3→S4→S6           | 5.02698705381631e-06  | 1.7%   | 98.5%      |
| S1→S3→S4→S2→S6        | 4.336307732296836e-06 | 1.5%   | 100%       |
